# Supplementary material
Source: publisher figshare collection journal article supplement (https://sage.figshare.com/ndownloader/files/14746724)
Supplement: Supplementary file 1 [file 14746724]

**Table 8. RNA expression of the glucose transporter-2 (GLUT-2; number of copies)**

|                      | <b>100-300μ</b> | <b>300-500μ</b> | <b>Sham</b>    | <b>100-300μ<br/>vs.<br/>300-500μ (p)</b> | <b>100-300μ<br/>vs.<br/>Sham (p)</b> | <b>300-500μ<br/>vs.<br/>Sham (p)</b> |
|----------------------|-----------------|-----------------|----------------|------------------------------------------|--------------------------------------|--------------------------------------|
| <b>T0</b>            | 34.81±2.28      | 32.04±3.48      | 32.26±1.68     | 0.12                                     | 0.13                                 | 0.4                                  |
| <b>T2</b>            | 30.96±0.93      | 31.9±2.12       | 30.62±1.71     | 0.25                                     | 0.47                                 | 0.2                                  |
| <b>T3</b>            | 32.37±4         | 30.94±1.6       | 31.85±1.85     | 0.29                                     | 0.37                                 | 0.27                                 |
| <b>T4</b>            | 37.15±0.5       | 32.32±2.01      | 38.19±0.51     | <b>0.01</b>                              | <b>0.03</b>                          | <b>0.0078</b>                        |
|                      |                 |                 |                |                                          |                                      |                                      |
| <b>T0 vs. T2 (p)</b> | 0.10            | 0.47            | <b>0.045</b>   |                                          |                                      |                                      |
| <b>T0 vs. T3 (p)</b> | 0.24            | 0.32            | 0.43           |                                          |                                      |                                      |
| <b>T0 vs. T4 (p)</b> | 0.13            | 0.46            | <b>0.0058</b>  |                                          |                                      |                                      |
| <b>T2 vs. T3 (p)</b> | 0.24            | 0.32            | 0.43           |                                          |                                      |                                      |
| <b>T2 vs. T4 (p)</b> | 0.2             | 0.27            | 0.1            |                                          |                                      |                                      |
| <b>T3 vs. T4 (p)</b> | <b>0.044</b>    | 0.41            | <b>0.00013</b> |                                          |                                      |                                      |

GLUT-2 RNA expression is expressed in number of copies. T0= before embolization; T2= after 1 month; T3= after 3 months; T4= after 6 months. Data are expressed as mean ± SD (standard deviation). A p value <0.05 was considered statistically significant.
